# Supplementary material for: An electrochemical algal biosensor based on silica coated ZnO quantum dots for selective determination of acephate
Source: Royal Society of Chemistry journal article supplement (doi:10.1039/c7ay00111h), 2017-01-01
Supplement: c7ay00111h1.pdf [file c7ay00111h1.pdf]

## Supplementary Information

### EDS analysis of SiO<sub>2</sub>-ZnO QDs

Electron dispersion spectrometric (EDS) analysis of SiO<sub>2</sub>@ZnO QDs is shown in Fig. S1. Elemental analysis shows the presence of Zn, O and Si in the weight percentage of 50.98, 31.94 and 17.09, respectively, which is expected from the sample.

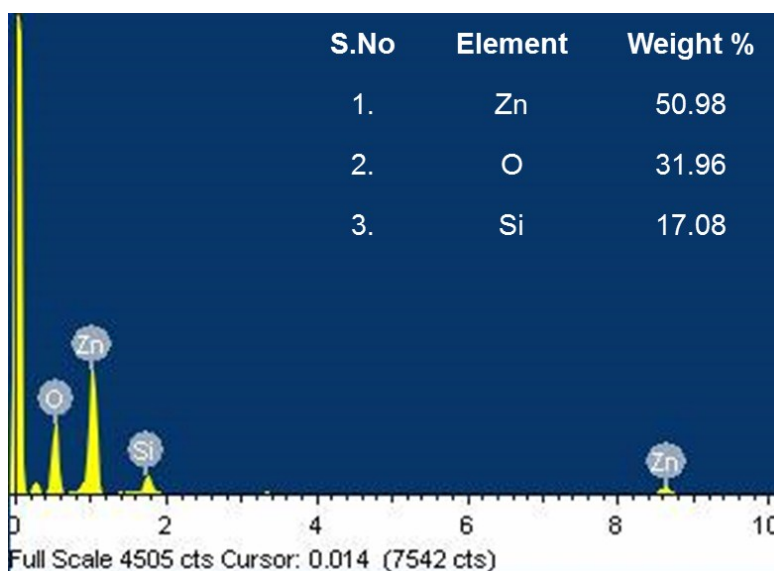

Fig. S1 EDS analysis of SiO<sub>2</sub>-ZnO QDs
